# Supplementary material for: Annually Spatial Pattern Dynamics of Forest Types under a Rapid Expansion of Impervious Surfaces: A Case Study of Hangzhou City
Source: MDPI journal article supplement (doi:10.3390/f15010044), 2023-12-24
Supplement: s1 [file s1]

**Table S1.** List of Landsat images used to create a mosaic for mapping forest types and impervious surfaces.

| Year | Season | Sensor         | Path/Row | Acquisition date (m/d)                   | Usage          |
|------|--------|----------------|----------|------------------------------------------|----------------|
| 2000 | Summer | Landsat-5 TM   | 118/39   | 06/06, 07/08, 07/24, 08/09               | Classification |
|      |        |                | 119/39   | 06/13, 06/29, 07/15, 07/31, 08/16        |                |
|      |        |                | 119/40   | 06/13, 06/29, 07/15, 07/31, 08/16        |                |
|      |        |                | 120/39   | 06/20, 07/06, 07/22, 08/07, 08/23        |                |
|      |        |                | 120/40   | 06/20, 07/06, 07/22, 08/07               |                |
|      |        | Landsat-7 ETM+ | 118/39   | 06/14, 06/30, 07/16, 08/01, 08/17        | Auxiliary      |
|      |        |                | 119/39   | 06/05, 07/07, 07/23, 08/08               |                |
|      |        |                | 119/40   | 06/05, 07/07, 07/23, 08/08               |                |
|      |        |                | 120/39   | 06/12, 06/28, 07/14, 07/30, 08/15        |                |
|      |        |                | 120/40   | 06/28, 07/14, 07/30, 08/15               |                |
|      | Winter | Landsat-5 TM   | 118/39   | 12/15, 12/31, 01/16, 02/01, 02/17        | Auxiliary      |
|      |        |                | 119/39   | 12/06, 12/22, 01/07, 01/23               |                |
|      |        |                | 119/40   | 12/06, 12/22, 01/07, 01/23               |                |
|      |        |                | 120/39   | 01/14, 01/30, 02/15                      |                |
|      |        |                | 120/40   | 01/14, 01/30, 02/15                      |                |
|      |        | Landsat-7 ETM+ | 118/39   | 12/07, 12/23, 02/09, 02/25               | Auxiliary      |
|      |        |                | 119/39   | 12/14, 01/15, 02/16                      |                |
|      |        |                | 119/40   | 12/14, 12/30, 01/15, 02/16               |                |
|      |        |                | 120/39   | 12/05, 12/21, 02/23                      |                |
|      |        |                | 120/40   | 12/05, 12/21, 01/06, 02/23               |                |
| 2001 | Summer | Landsat-5 TM   | 118/39   | 06/09, 07/11, 07/27, 08/12               | Classification |
|      |        |                | 119/39   | 06/16, 07/02, 07/18, 08/03, 08/19        |                |
|      |        |                | 119/40   | 06/16, 07/02, 07/18, 08/03, 08/19        |                |
|      |        |                | 120/39   | 06/07, 07/09, 08/26                      |                |
|      |        |                | 120/40   | 06/07, 06/23, 07/09, 08/26               |                |
|      |        | Landsat-7 ETM+ | 118/39   | 06/01, 06/17, 07/03, 07/19, 08/04, 08/20 | Auxiliary      |
|      |        |                | 119/39   | 06/08, 07/10, 07/26, 08/27               |                |
|      |        |                | 119/40   | 06/08, 07/10, 07/26, 08/11               |                |
|      |        |                | 120/39   | 06/15, 07/01, 07/17, 08/02, 08/18        |                |
|      |        |                | 120/40   | 06/15, 07/01, 08/02, 08/18               |                |
|      | Winter | Landsat-5 TM   | 118/39   | 12/02, 01/03, 01/19, 02/20               | Auxiliary      |
|      |        |                | 119/39   | 01/10, 02/11, 02/27                      |                |
|      |        |                | 119/40   | 01/10, 02/11, 02/27                      |                |
|      |        |                | 120/39   | 02/02, 02/18                             |                |
|      |        |                | 120/40   | 02/02, 02/18                             |                |
|      |        | Landsat-7 ETM+ | 118/39   | 12/26, 01/11, 01/27, 02/12               | Auxiliary      |
|      |        |                | 119/39   | 01/02, 02/03, 02/19                      |                |
|      |        |                | 119/40   | 01/02, 02/03, 02/19                      |                |
|      |        |                | 120/39   | 12/24, 02/10                             |                |
|      |        |                | 120/40   | 12/24, 02/10                             |                |
| 2002 | Summer | Landsat-5 TM   | 118/39   | 07/14, 07/30, 08/15                      | Auxiliary      |
|      |        |                | 119/39   | 08/06, 08/22                             |                |
|      |        |                | 119/40   | 07/05, 08/22                             |                |
|      |        |                | 120/39   | 06/10, 06/26, 07/12, 07/28               |                |

|      |                |                |        |                                          |                |
|------|----------------|----------------|--------|------------------------------------------|----------------|
| 2003 | Winter         | Landsat-7 ETM+ | 120/40 | 06/10, 06/26, 07/12, 07/28, 08/13        | Auxiliary      |
|      |                |                | 118/39 | 06/04, 07/06, 07/22, 08/23               |                |
|      |                |                | 119/39 | 06/11, 06/27, 07/13, 08/14, 08/30        |                |
|      |                |                | 119/40 | 06/11, 06/27, 07/13, 08/14, 08/30        |                |
|      |                |                | 120/39 | 06/02, 06/18, 07/04, 08/05, 08/21        |                |
|      |                |                | 120/40 | 06/02, 06/18, 07/04, 08/05, 08/21        |                |
|      |                | Landsat-5 TM   | 119/39 | 01/13, 01/29                             | Classification |
|      |                |                | 119/40 | 01/13, 01/29                             |                |
|      |                |                | 120/39 | 01/04, 02/05, 02/21                      |                |
|      |                |                | 120/40 | 01/04, 02/05, 02/21                      |                |
|      | Landsat-7 ETM+ |                | 118/39 | 12/13, 01/14, 01/30                      | Auxiliary      |
|      |                |                | 119/39 | 12/04, 01/05, 01/21, 02/06, 02/22        |                |
|      |                |                | 119/40 | 12/04, 01/05, 01/21, 02/06, 02/22        |                |
|      |                |                | 120/39 | 12/11, 12/27, 01/12, 01/28, 02/13        |                |
|      |                |                | 120/40 | 12/27, 01/12, 01/28, 02/13               |                |
| 2004 | Summer         | Landsat-5 TM   | 118/39 | 06/15, 07/01, 07/17, 08/02, 08/18        | Auxiliary      |
|      |                |                | 119/39 | 06/06, 07/08, 07/24, 08/09, 08/25        |                |
|      |                |                | 119/40 | 06/22, 07/08, 07/24, 08/09, 08/25        |                |
|      |                |                | 120/39 | 07/15, 07/31, 08/16                      |                |
|      |                |                | 120/40 | 06/29, 07/15, 07/31, 08/16               |                |
|      | Landsat-7 ETM+ |                | 118/39 | 07/25                                    | Auxiliary      |
|      |                |                | 119/39 | 08/01                                    |                |
|      |                |                | 119/40 | 08/01                                    |                |
|      |                |                | 120/39 | 07/23, 08/24                             |                |
|      |                |                | 120/40 | 07/23, 08/24                             |                |
|      | Winter         | Landsat-5 TM   | 118/39 | 12/08, 12/24, 01/25, 02/10, 02/26        | Auxiliary      |
|      |                |                | 119/39 | 12/15, 02/17                             |                |
|      |                |                | 119/40 | 12/15, 02/17                             |                |
|      |                |                | 120/39 | 12/06, 01/07, 01/23, 02/08               |                |
|      |                |                | 120/40 | 12/22, 01/23, 02/08                      |                |
|      | Landsat-7 ETM+ |                | 118/39 | 12/16, 01/01                             | Classification |
|      |                |                | 119/39 | 12/07, 12/23, 01/24, 02/09, 02/25        |                |
|      |                |                | 119/40 | 12/07, 12/23, 01/24, 02/09, 02/25        |                |
|      |                |                | 120/39 | 12/14, 01/31, 02/16                      |                |
|      |                |                | 120/40 | 12/14, 12/30, 01/31, 02/16               |                |
|      | Summer         | Landsat-5 TM   | 118/39 | 06/01, 06/17, 07/19, 08/04, 08/20        | Classification |
|      |                |                | 119/39 | 06/08, 07/10, 07/26, 08/11, 08/27        |                |
|      |                |                | 119/40 | 06/08, 06/24, 07/10, 07/26, 08/11, 08/27 |                |
|      |                |                | 120/39 | 07/01, 07/17, 08/02, 08/18               |                |
|      |                |                | 120/40 | 06/15, 07/01, 07/17, 08/02, 08/18        |                |
|      | Landsat-7 ETM+ |                | 118/39 | 06/09, 06/25, 07/11, 07/27, 08/12, 08/28 | Auxiliary      |
|      |                |                | 119/39 | 07/02, 07/18, 08/03, 08/19               |                |
|      |                |                | 119/40 | 07/02, 07/18, 08/03, 08/19               |                |
|      |                |                | 120/39 | 06/07, 07/09, 07/25, 08/10               |                |
|      |                |                | 120/40 | 07/09, 07/25, 08/10, 08/26               |                |
|      | Winter         | Landsat-5 TM   | 118/39 | 12/10                                    | Auxiliary      |
|      |                |                | 119/39 | 12/01, 12/17, 01/18, 02/03, 02/19        |                |
|      |                |                | 119/40 | 12/01, 12/17, 01/02, 02/19               |                |

|      |        |                |        |                                          |                |
|------|--------|----------------|--------|------------------------------------------|----------------|
| 2005 |        | Landsat-7 ETM+ | 120/39 | 12/08, 01/09, 02/26                      | Auxiliary      |
|      |        |                | 120/40 | 12/08, 01/09                             |                |
|      |        |                | 118/39 | 12/02, 12/18, 01/03, 01/19, 02/20        |                |
|      |        |                | 119/39 | 12/09, 12/25, 01/10, 01/26               |                |
|      |        |                | 119/40 | 12/09, 01/10                             |                |
|      |        |                | 120/39 | 12/16, 01/01, 01/17                      |                |
|      | Summer | Landsat-5 TM   | 120/40 | 12/16, 01/01, 01/17                      | Auxiliary      |
|      |        |                | 118/39 | 06/04, 06/20, 07/06, 07/22               |                |
|      |        |                | 119/39 | 06/11, 06/27, 07/29, 08/14, 08/30        |                |
|      |        |                | 119/40 | 06/27, 07/13, 07/29, 08/30               |                |
|      |        |                | 120/39 | 06/02, 07/04, 08/21                      |                |
|      |        |                | 120/40 | 06/02, 07/04                             |                |
|      | Winter | Landsat-7 ETM+ | 118/39 | 06/12, 06/28, 07/14, 07/30, 08/15        | Classification |
|      |        |                | 119/39 | 06/03, 06/19, 07/05                      |                |
|      |        |                | 119/40 | 06/03, 07/05                             |                |
|      |        |                | 120/39 | 07/28, 08/29                             |                |
|      |        |                | 120/40 | 07/28, 08/29                             |                |
|      |        |                | 118/39 | 02/15                                    |                |
| 2006 |        | Landsat-5 TM   | 119/40 | 02/06                                    | Auxiliary      |
|      |        |                | 120/39 | 01/28, 02/13                             |                |
|      |        |                | 120/40 | 01/28, 02/13                             |                |
|      | Winter | Landsat-7 ETM+ | 118/39 | 12/05, 12/21, 01/06, 01/22, 02/07, 02/23 | Auxiliary      |
|      |        |                | 119/39 | 12/12, 01/29, 02/14                      |                |
|      |        |                | 119/40 | 12/12, 01/29, 02/14                      |                |
|      |        |                | 120/39 | 12/19, 02/21                             |                |
|      |        |                | 120/40 | 12/19, 02/21                             |                |
|      | Summer | Landsat-5 TM   | 118/39 | 06/23, 07/09, 07/25, 08/10, 08/26        | Auxiliary      |
|      |        |                | 119/39 | 06/30, 08/01, 08/17                      |                |
|      |        |                | 119/40 | 06/30, 08/01, 08/17                      |                |
|      |        |                | 120/39 | 06/21, 07/07, 08/08, 08/24               |                |
|      |        |                | 120/40 | 06/21, 07/07, 07/23, 08/08, 08/24        |                |
|      |        |                | 118/39 | 06/15, 08/02, 08/18                      | Auxiliary      |
| 2007 |        | Landsat-7 ETM+ | 119/39 | 06/06, 06/22, 08/09, 08/25               |                |
|      |        |                | 119/40 | 06/22, 08/09, 08/25                      |                |
|      |        |                | 120/39 | 06/13, 06/29, 07/31, 08/16               |                |
|      |        |                | 120/40 | 07/31, 08/16                             |                |
|      | Summer | Landsat-5 TM   | 118/39 | 12/16, 02/02                             | Classification |
|      |        |                | 119/39 | 12/07, 12/23, 01/08, 01/24               |                |
|      |        |                | 119/40 | 12/07, 12/23, 01/08, 01/24, 02/09        |                |
|      |        |                | 120/39 | 12/14, 12/30, 01/31                      |                |
|      |        |                | 120/40 | 12/30, 01/15, 01/31, 02/16               |                |
|      | Winter | Landsat-7 ETM+ | 118/39 | 12/24, 01/09, 01/25, 02/10, 02/26        | Auxiliary      |
|      |        |                | 119/39 | 12/15, 02/01                             |                |
|      |        |                | 119/40 | 12/15, 02/01                             |                |
|      |        |                | 120/39 | 12/22, 01/07                             |                |
|      |        |                | 120/40 | 12/06, 12/22, 01/07, 02/08               |                |
|      |        |                | 118/39 | 06/10, 06/26, 07/12, 07/28, 08/13, 08/29 | Auxiliary      |
|      |        |                | 119/39 | 06/17, 07/03,, 07/19, 08/04, 08/20       |                |

|      |        |                |        |                                          |                |
|------|--------|----------------|--------|------------------------------------------|----------------|
| 2008 | Winter |                | 119/40 | 06/17, 07/03, 07/19, 08/04               | Auxiliary      |
|      |        |                | 120/39 | 06/24, 07/26, 08/11                      |                |
|      |        |                | 120/40 | 06/24, 07/10, 07/26, 08/11               |                |
|      |        |                | 118/39 | 06/18, 08/21                             |                |
|      |        | Landsat-7 ETM+ | 119/39 | 07/11                                    |                |
|      |        |                | 119/40 | 06/09, 07/11, 07/27, 08/28               |                |
|      |        |                | 120/39 | 06/16, 07/18                             |                |
|      |        |                | 120/40 | 06/16, 07/18                             |                |
|      |        | Landsat-5 TM   | 119/39 | 02/12, 02/28                             | Auxiliary      |
|      |        |                | 119/40 | 02/12, 02/28                             |                |
|      |        |                | 120/39 | 02/03                                    |                |
|      |        |                | 120/40 | 02/03                                    |                |
|      |        | Landsat-7 ETM+ | 118/39 | 12/11, 02/13                             |                |
|      |        |                | 119/39 | 01/03, 02/04, 02/20                      |                |
|      |        |                | 119/40 | 12/02, 01/03, 02/04, 02/20               |                |
|      |        |                | 120/39 | 12/09, 01/10, 02/27                      |                |
| 2008 | Summer |                | 120/40 | 01/10, 02/27                             | Classification |
|      |        |                | 118/39 | 06/12, 07/14, 08/15                      |                |
|      |        |                | 119/39 | 06/03, 07/05, 07/21, 08/06, 08/22        |                |
|      |        |                | 119/40 | 06/03, 06/19, 07/05, 07/21, 08/06, 08/22 |                |
|      |        | Landsat-5 TM   | 120/39 | 06/26, 07/12, 07/28, 08/13               |                |
|      |        |                | 120/40 | 07/12, 07/28, 08/13, 08/29               |                |
|      |        |                | 118/39 | 06/04, 06/20, 07/06, 07/22, 08/07, 08/23 |                |
|      |        |                | 119/39 | 08/14                                    |                |
|      |        | Landsat-7 ETM+ | 119/40 | 08/14, 08/30                             | Auxiliary      |
|      |        |                | 120/39 | 06/02, 07/04, 07/20, 08/05, 08/21        |                |
|      |        |                | 120/40 | 06/02, 07/04, 07/20, 08/21               |                |
|      |        |                | 118/39 | 12/05, 02/07                             |                |
|      |        | Landsat-5 TM   | 119/39 | 12/12, 01/13                             |                |
|      |        |                | 119/40 | 12/12, 01/13, 02/14                      |                |
|      |        |                | 120/39 | 12/03, 12/19, 02/21                      |                |
|      |        |                | 120/40 | 12/03, 12/19, 01/04, 02/21               |                |
| 2009 | Winter |                | 118/39 | 12/13, 01/14                             | Classification |
|      |        |                | 119/39 | 12/04, 12/20, 02/06                      |                |
|      |        |                | 119/40 | 12/04, 12/20, 01/05, 01/21, 02/06, 02/22 |                |
|      |        |                | 120/39 | 12/11, 01/12, 01/28, 02/13               |                |
|      |        | Landsat-7 ETM+ | 120/40 | 12/11, 01/12, 02/13                      |                |
|      |        |                | 118/39 | 06/15, 07/01, 07/17, 08/18               |                |
|      |        |                | 119/39 | 06/06, 06/22, 07/08, 08/25               |                |
|      |        |                | 119/40 | 06/06, 06/22, 07/08, 08/25               |                |
|      | Summer | Landsat-5 TM   | 120/39 | 06/13, 07/31, 08/16                      | Classification |
|      |        |                | 120/40 | 06/13, 07/31, 08/16                      |                |
|      |        |                | 118/39 | 06/07, 06/23, 08/26                      |                |
|      |        |                | 119/39 | 06/14, 07/16, 08/17                      |                |
|      |        | Landsat-7 ETM+ | 119/40 | 06/14, 07/16, 08/17                      |                |
|      |        |                | 120/39 | 06/05, 06/21, 08/08, 08/24               |                |
|      |        |                | 120/40 | 06/05, 06/21, 08/08, 08/24               |                |
|      |        |                | 118/39 | 01/25, 02/10                             |                |
| 2009 | Winter | Landsat-5 TM   | 118/39 | 01/25, 02/10                             | Auxiliary      |
|      |        |                | 119/39 | 06/07, 06/23, 08/26                      |                |
|      |        |                | 119/40 | 06/14, 07/16, 08/17                      |                |
|      |        |                | 120/39 | 06/05, 06/21, 08/08, 08/24               |                |
|      |        | Landsat-7 ETM+ | 120/40 | 06/05, 06/21, 08/08, 08/24               |                |
|      |        |                | 118/39 | 01/25, 02/10                             |                |
|      |        |                | 119/39 | 06/07, 06/23, 08/26                      |                |
|      |        |                | 119/40 | 06/14, 07/16, 08/17                      |                |
|      |        | Landsat-5 TM   | 120/39 | 06/05, 06/21, 08/08, 08/24               | Auxiliary      |
|      |        |                | 120/40 | 06/05, 06/21, 08/08, 08/24               |                |
|      |        |                | 118/39 | 01/25, 02/10                             |                |
|      |        |                | 119/39 | 06/07, 06/23, 08/26                      |                |
|      |        | Landsat-7 ETM+ | 119/40 | 06/14, 07/16, 08/17                      |                |
|      |        |                | 120/39 | 06/05, 06/21, 08/08, 08/24               |                |
|      |        |                | 120/40 | 06/05, 06/21, 08/08, 08/24               |                |
|      |        |                | 118/39 | 01/25, 02/10                             |                |

|      |        |                |        |                                                          |                |
|------|--------|----------------|--------|----------------------------------------------------------|----------------|
| 2010 |        |                | 119/39 | 01/16, 02/17                                             | Auxiliary      |
|      |        |                | 119/40 | 01/16                                                    |                |
|      |        |                | 120/39 | 01/23                                                    |                |
|      |        |                | 120/40 | 02/08, 02/24                                             |                |
|      |        |                | 118/39 | 12/16, 01/01, 01/17                                      |                |
|      |        |                | 119/39 | 12/07, 12/23, 01/08, 01/24, 02/09                        |                |
|      |        |                | 119/40 | 12/07, 12/23, 01/08, 02/09, 02/25                        |                |
|      |        |                | 120/39 | 12/30, 01/15, 02/16                                      |                |
|      |        |                | 120/40 | 12/30, 01/15                                             |                |
|      |        |                | 118/39 | 07/04, 07/20, 08/05, 08/21                               |                |
|      | Summer | Landsat-5 TM   | 119/39 | 08/12                                                    | Auxiliary      |
|      |        |                | 119/40 | 07/11, 08/12                                             |                |
|      |        |                | 120/39 | 06/16, 07/02, 07/18, 08/03, 08/19                        |                |
|      |        |                | 120/40 | 06/16, 07/02, 07/18, 08/03, 08/19                        |                |
|      |        |                | 118/39 | 07/28, 08/29                                             |                |
|      |        | Landsat-7 ETM+ | 119/39 | 06/01, 07/19, 08/04, 08/20                               | Auxiliary      |
|      |        |                | 119/40 | 06/01, 07/19, 08/04, 08/20                               |                |
|      |        |                | 120/39 | 07/26, 08/11                                             |                |
|      |        |                | 120/40 | 07/26, 08/11                                             |                |
|      |        |                | 118/39 | 12/11, 12/27, 01/12, 02/13                               |                |
|      | Winter | Landsat-5 TM   | 119/39 | 12/02, 12/18, 02/04, 02/20                               | Classification |
|      |        |                | 119/40 | 12/02, 12/18, 02/04, 02/20                               |                |
|      |        |                | 120/39 | 12/09, 12/25, 01/10, 02/11, 02/27                        |                |
|      |        |                | 120/40 | 12/09, 01/10, 02/27                                      |                |
|      |        |                | 118/39 | 12/03, 12/19, 01/04, 02/05, 02/21                        |                |
|      |        | Landsat-7 ETM+ | 119/39 | 12/10, 12/26, 01/11, 02/12                               | Auxiliary      |
|      |        |                | 119/40 | 12/10, 12/26, 02/12                                      |                |
|      |        |                | 120/39 | 12/01, 12/17, 02/03, 02/19                               |                |
|      |        |                | 120/40 | 12/01, 12/17, 02/03                                      |                |
|      |        |                | 118/39 | 06/21, 07/23, 08/08                                      |                |
|      | Summer | Landsat-5 TM   | 119/39 | 06/28, 07/30, 08/15                                      | Classification |
|      |        |                | 119/40 | 06/28, 07/30, 08/15                                      |                |
|      |        |                | 120/39 | 06/03, 07/21, 08/06                                      |                |
|      |        |                | 120/40 | 07/21, 08/06                                             |                |
|      |        |                | 118/39 | 08/16                                                    |                |
|      |        | Landsat-7 ETM+ | 119/39 | 07/22, 08/07                                             | Auxiliary      |
|      |        |                | 119/40 | 06/20, 07/22, 08/07                                      |                |
|      |        |                | 120/39 | 06/27, 07/29, 08/14                                      |                |
|      |        |                | 120/40 | 06/27, 07/29, 08/14                                      |                |
|      |        |                | 118/39 | 12/22, 01/07, 01/23, 02/08                               |                |
|      | Winter | Landsat-7 ETM+ | 119/39 | 12/13                                                    | Auxiliary      |
|      |        |                | 119/40 | 12/13                                                    |                |
|      |        |                | 120/39 | 12/04, 02/22                                             |                |
|      |        |                | 120/40 | 12/04, 12/20, 02/22                                      |                |
|      |        |                | 118/39 | 01/07, 01/23, 02/08, 03/11, 03/27, 04/12,                |                |
|      |        | Landsat-7 ETM+ |        | 04/28, 05/14, 06/15, 08/18, 09/03, 09/19, Classification |                |
|      |        |                |        | 10/05, 10/21, 11/06, 12/08, 12/24                        |                |
|      |        |                |        |                                                          |                |
|      |        |                |        |                                                          |                |
|      |        |                |        |                                                          |                |

|      |                |                     |                            |                                                                                                                             |                                   |
|------|----------------|---------------------|----------------------------|-----------------------------------------------------------------------------------------------------------------------------|-----------------------------------|
| 2013 | Summer         | Landsat-7 ETM+      | 119/39                     | 03/18, 04/03, 04/19, 05/05, 05/21, 09/26,<br>10/12, 10/28, 11/13, 11/29                                                     | Auxiliary                         |
|      |                |                     | 119/40                     | 03/18, 04/03, 04/19, 05/05, 05/21, 09/26,<br>10/12, 11/13, 11/29                                                            |                                   |
|      |                |                     | 120/39                     | 02/22, 03/25, 04/10, 04/26, 05/12, 05/28,<br>06/13, 06/29, 07/31, 08/16, 09/01, 09/17,<br>10/03, 10/19, 11/04, 11/20, 12/06 |                                   |
|      |                |                     | 120/40                     | 02/22, 03/25, 04/10, 04/26, 05/28, 06/13,<br>06/29, 07/31, 08/16, 09/01, 09/17, 10/03,<br>10/19, 11/04, 11/20, 12/06        |                                   |
|      |                | Landsat-8 OLI       | 118/39                     | 07/20, 08/21                                                                                                                | Classification                    |
|      |                |                     | 119/39                     | 07/11, 07/27, 08/12, 08/28                                                                                                  |                                   |
|      |                |                     | 119/40                     | 07/11, 07/27, 08/12, 08/28                                                                                                  |                                   |
|      |                |                     | 120/39                     | 06/16, 07/02, 07/18                                                                                                         |                                   |
|      | Winter         | Landsat-7 ETM+      | 120/40                     | 06/16, 07/02, 07/18, 08/03, 09/19                                                                                           | Auxiliary                         |
|      |                |                     | 118/39                     | 06/10, 07/12, 07/28, 08/13, 08/29                                                                                           |                                   |
|      |                |                     | 119/39                     | 06/17, 07/03, 07/19, 08/04, 08/20                                                                                           |                                   |
|      |                |                     | 119/40                     | 06/01, 06/17, 07/03, 07/19, 08/04                                                                                           |                                   |
|      |                | Landsat-8 OLI       | 120/39                     | 07/10, 07/26, 08/11, 08/27                                                                                                  | Auxiliary                         |
|      |                |                     | 120/40                     | 06/24, 07/10, 07/26, 08/11, 08/27                                                                                           |                                   |
|      |                |                     | 118/39                     | 12/11, 12/27, 01/28, 02/13                                                                                                  |                                   |
|      |                |                     | 119/39                     | 12/02, 12/18, 01/03, 01/19, 02/04, 02/20                                                                                    |                                   |
| 2014 | Summer         | Landsat-7 ETM+      | 119/40                     | 12/02, 12/18, 01/03, 01/19, 02/20                                                                                           | Auxiliary                         |
|      |                |                     | 120/39                     | 12/09, 12/25, 01/10, 01/26, 02/11                                                                                           |                                   |
|      |                |                     | 120/40                     | 12/09, 12/25, 01/10, 01/26, 02/11                                                                                           |                                   |
|      |                |                     | 118/39                     | 12/03, 12/19, 01/04, 01/20, 02/21                                                                                           |                                   |
|      |                | Landsat-8 OLI       | 119/39                     | 12/10, 12/26, 01/27                                                                                                         | Auxiliary                         |
|      |                |                     | 119/40                     | 12/10, 12/26, 01/27                                                                                                         |                                   |
|      |                |                     | 120/39                     | 12/01, 01/02, 01/18, 02/03, 02/19                                                                                           |                                   |
|      |                |                     | 120/40                     | 12/01, 01/02, 01/18, 02/03, 02/19                                                                                           |                                   |
|      | Winter         | Landsat-7 ETM+      | 118/39                     | 06/05, 07/07, 07/23, 08/08, 08/24                                                                                           | Auxiliary                         |
|      |                |                     | 119/39                     | 06/12, 07/14, 07/30                                                                                                         |                                   |
|      |                |                     | 119/40                     | 06/12, 07/14, 07/30                                                                                                         |                                   |
|      |                |                     | 120/39                     | 06/03, 06/19, 07/21, 08/06, 08/22                                                                                           |                                   |
|      |                | Landsat-8 OLI       | 120/40                     | 06/03, 06/19, 07/05, 07/21, 08/06, 08/22                                                                                    | Auxiliary                         |
|      |                |                     | 118/39                     | 06/13, 06/29, 07/31                                                                                                         |                                   |
|      |                |                     | 119/39                     | 06/04, 07/22, 08/07, 08/23                                                                                                  |                                   |
|      |                |                     | 119/40                     | 06/04, 07/06, 07/22, 08/07, 08/23                                                                                           |                                   |
|      |                | 120/39              | 06/11, 07/29               | Classification                                                                                                              |                                   |
|      |                | 120/40              | 06/11, 07/13, 07/29, 08/30 |                                                                                                                             |                                   |
|      |                | 118/39              | 12/14, 12/30, 01/31, 02/16 |                                                                                                                             |                                   |
|      |                | 119/39              | 12/05, 12/21, 01/22, 02/07 |                                                                                                                             |                                   |
|      | Landsat-7 ETM+ | 119/40              | 12/05, 12/21, 01/22, 02/07 | Auxiliary                                                                                                                   |                                   |
|      |                | 120/39              | 12/12, 12/28, 02/14        |                                                                                                                             |                                   |
|      |                | 120/40              | 12/12, 12/28, 02/14        |                                                                                                                             |                                   |
|      |                | Landsat-8 OLI       | 118/39                     |                                                                                                                             | 12/06, 12/22, 01/07, 01/23, 02/08 |
|      | 119/39         | 12/13, 12/29, 02/15 |                            |                                                                                                                             |                                   |
|      | 119/40         | 12/13, 12/29, 02/15 |                            |                                                                                                                             |                                   |

|      |                |                |                                                 |                |
|------|----------------|----------------|-------------------------------------------------|----------------|
|      |                | 120/39         | 12/04, 12/20, 01/21, 02/06, 02/22               |                |
|      |                | 120/40         | 12/04, 12/20, 01/21, 02/06, 02/22               |                |
| 2015 | Summer         | Landsat-7 ETM+ | 118/39 06/24, 07/10, 07/26, 08/27               | Classification |
|      |                |                | 119/39 06/15, 07/17, 08/02, 08/18               |                |
|      |                |                | 119/40 06/15, 07/17, 08/02, 08/18               |                |
|      |                |                | 120/39 06/06, 08/25                             |                |
|      |                |                | 120/40 06/06, 08/25                             |                |
|      | Landsat-8 OLI  |                | 118/39 06/16, 07/02, 07/18, 08/03, 08/19        | Auxiliary      |
|      |                |                | 119/39 06/07, 06/23, 07/25, 08/26               |                |
|      |                |                | 119/40 06/07, 06/23, 07/25, 08/26               |                |
|      |                |                | 120/39 06/30, 08/01, 08/17                      |                |
|      |                |                | 120/40 06/30, 07/16, 08/01, 08/17               |                |
|      | Landsat-7 ETM+ |                | 118/39 12/01, 12/17, 01/02, 02/03               | Auxiliary      |
|      |                |                | 119/39 12/08, 01/09, 01/25, 02/10, 02/26        |                |
|      |                |                | 119/40 12/08, 01/09, 01/25, 02/10               |                |
|      |                |                | 120/39 12/15, 12/31, 01/16, 02/01, 02/17        |                |
|      |                |                | 120/40 12/15, 12/31, 01/16, 02/17               |                |
|      | Landsat-8 OLI  |                | 118/39 12/25, 01/26, 02/27                      | Auxiliary      |
|      |                |                | 119/39 12/16, 01/01, 02/02, 02/18               |                |
|      |                |                | 119/40 12/16, 01/01, 02/02, 02/18               |                |
|      |                |                | 120/39 12/07, 01/24, 02/09, 02/25               |                |
|      |                |                | 120/40 12/07, 01/24, 02/09, 02/25               |                |
| 2016 | Summer         | Landsat-7 ETM+ | 118/39 06/10, 07/12, 07/28, 08/13, 08/29        | Auxiliary      |
|      |                |                | 119/39 06/17, 07/19, 08/04, 08/20               |                |
|      |                |                | 119/40 06/01, 06/17, 07/19, 08/04, 08/20        |                |
|      |                |                | 120/39 06/24, 07/26, 08/11, 08/27               |                |
|      |                |                | 120/40 06/08, 06/24, 07/10, 07/26, 08/11        |                |
|      | Landsat-8 OLI  |                | 118/39 06/02, 06/18, 07/04, 07/20, 08/05, 08/21 | Classification |
|      |                |                | 119/39 06/09, 07/27, 08/12, 08/28               |                |
|      |                |                | 119/40 06/09, 06/25, 07/27, 08/12, 08/28        |                |
|      |                |                | 120/39 06/16, 07/02, 07/18, 08/29               |                |
|      |                |                | 120/40 07/02, 07/18, 08/03, 08/29               |                |
|      | Landsat-7 ETM+ |                | 118/39 12/03, 12/19, 01/04, 01/20               | Auxiliary      |
|      |                |                | 119/39 12/10, 01/27, 02/12                      |                |
|      |                |                | 119/40 12/10, 01/27, 02/12                      |                |
|      |                |                | 120/39 12/01, 12/17, 02/19                      |                |
|      |                |                | 120/40 12/01, 12/17, 02/19                      |                |
|      | Landsat-8 OLI  |                | 118/39 12/11, 12/27, 01/28, 02/13               | Auxiliary      |
|      |                |                | 119/39 12/02, 12/18, 01/03, 02/20               |                |
|      |                |                | 119/40 12/02, 01/03, 02/04, 02/20               |                |
|      |                |                | 120/39 12/09, 01/26, 02/11, 02/27               |                |
|      |                |                | 120/40 12/09, 12/25, 01/10, 01/26, 02/11, 02/27 |                |
| 2017 | Summer         | Landsat-7 ETM+ | 118/39 06/29, 07/15, 07/31, 08/16               | Auxiliary      |
|      |                |                | 119/39 06/04, 07/06, 07/22, 08/07, 08/23        |                |
|      |                |                | 119/40 07/06, 07/22, 08/07, 08/23               |                |
|      |                |                | 120/39 06/27, 07/13, 07/29, 08/14, 08/30        |                |
|      |                |                | 120/40 06/27, 07/13, 07/29, 08/14, 08/30        |                |
|      |                | Landsat-8 OLI  | 118/39 07/07, 07/23, 08/08, 08/24               | Auxiliary      |

|      |        |                |        |                                          |                |
|------|--------|----------------|--------|------------------------------------------|----------------|
| 2018 | Winter | Landsat-7 ETM+ | 118/39 | 07/14, 07/30, 08/15                      | Auxiliary      |
|      |        |                | 119/40 | 07/14, 07/30, 08/15                      |                |
|      |        |                | 120/39 | 06/03, 07/05, 07/21, 08/06, 08/22        |                |
|      |        |                | 120/40 | 06/03, 07/05, 07/21, 08/06, 08/22        |                |
|      |        |                | 118/39 | 12/06, 12/22, 01/23, 02/08, 02/24        |                |
|      |        | Landsat-8 OLI  | 119/39 | 01/14, 01/30                             | Classification |
|      |        |                | 119/40 | 01/14, 01/30, 02/15                      |                |
|      |        |                | 120/39 | 12/04, 12/20, 02/06                      |                |
|      |        |                | 120/40 | 12/04, 12/20, 02/06                      |                |
|      |        |                | 118/39 | 01/15                                    |                |
|      | Summer | Landsat-7 ETM+ | 119/39 | 12/05, 12/21, 01/06, 01/22, 02/07, 02/23 | Classification |
|      |        |                | 119/40 | 12/05, 12/21, 01/22, 02/07, 02/23        |                |
|      |        |                | 120/39 | 12/12, 01/13, 01/29, 02/14               |                |
|      |        |                | 120/40 | 12/12, 01/13, 02/14                      |                |
|      |        |                | 118/39 | 06/16, 07/02, 07/18, 08/19               | Auxiliary      |
|      |        | Landsat-8 OLI  | 119/39 | 06/07, 07/09, 07/25, 08/10               |                |
|      |        |                | 119/40 | 06/07, 07/09, 07/25, 08/10               |                |
|      |        |                | 120/39 | 06/14, 07/16, 08/01                      |                |
|      |        |                | 120/40 | 06/14, 07/16, 08/01                      |                |
|      |        |                | 118/39 | 07/10, 07/26, 08/11, 08/27               |                |
| 2019 | Winter | Landsat-7 ETM+ | 119/39 | 06/15, 07/17, 08/02, 08/18               | Auxiliary      |
|      |        |                | 119/40 | 06/15, 07/17, 08/02, 08/18               |                |
|      |        |                | 120/39 | 06/06, 07/08, 07/24, 08/09               |                |
|      |        |                | 120/40 | 06/06, 07/08, 07/24, 08/09               |                |
|      |        |                | 118/39 | 01/26                                    | Auxiliary      |
|      |        | Landsat-8 OLI  | 119/39 | 12/16, 01/17, 02/02                      |                |
|      |        |                | 119/40 | 01/17, 02/02                             |                |
|      |        |                | 120/39 | 12/23, 01/24                             |                |
|      |        |                | 120/40 | 01/24                                    |                |
|      |        |                | 118/39 | 12/01, 12/17, 01/18, 02/03, 02/19        | Auxiliary      |
|      | Summer | Landsat-7 ETM+ | 119/39 | 12/24, 01/25, 02/26                      |                |
|      |        |                | 119/40 | 12/24                                    |                |
|      |        |                | 120/39 | 01/16, 02/01                             |                |
|      |        |                | 120/40 | 02/01                                    |                |
|      |        |                | 118/39 | 06/03, 07/21, 08/06, 08/22               | Auxiliary      |
|      |        | Landsat-8 OLI  | 119/39 | 06/10, 07/28, 08/13                      |                |
|      |        |                | 119/40 | 06/10, 06/26, 07/28, 08/13, 08/29        |                |
|      |        |                | 120/39 | 07/03, 08/04, 08/20                      |                |
|      |        |                | 120/40 | 06/17, 07/19, 08/04, 08/20               |                |
|      |        |                | 118/39 | 06/11, 06/27, 07/29, 08/14, 08/30        | Auxiliary      |
|      | Winter | Landsat-7 ETM+ | 119/39 | 06/02, 07/04, 07/20, 08/05, 08/21        |                |
|      |        |                | 119/40 | 07/20, 08/05, 08/21                      |                |
|      |        |                | 120/39 | 06/09, 07/11, 07/27, 08/12, 08/28        |                |
|      |        |                | 120/40 | 06/09, 07/11, 07/27, 08/12, 08/28        |                |
|      |        |                | 118/39 | 12/12, 12/08, 01/13, 01/29               | Auxiliary      |
|      |        |                | 119/39 | 12/03, 01/20, 02/05, 02/21               |                |
|      |        |                | 119/40 | 12/03, 01/20, 02/05, 02/21               |                |
|      |        |                | 120/39 | 12/10                                    |                |



|      |        |                |                      |                                   |                |
|------|--------|----------------|----------------------|-----------------------------------|----------------|
|      |        |                | 120/40               | 12/10, 02/28                      | Classification |
|      |        |                | 118/39               | 12/04, 01/21, 02/22               |                |
|      |        |                | 119/39               | 12/11, 12/27, 01/12, 02/13        |                |
|      |        |                | Landsat-8 OLI 119/40 | 12/11, 12/27, 02/13               |                |
|      |        |                | 120/39               | 12/02, 01/19, 02/04, 02/20        |                |
|      |        |                | 120/40               | 12/02, 01/19, 02/04, 02/20        |                |
| 2020 | Summer | Landsat-7 ETM+ | 118/39               | 07/07, 07/23, 08/08, 08/24        | Classification |
|      |        |                | 119/39               | 06/12, 06/28, 07/30, 08/15        |                |
|      |        |                | 119/40               | 06/12, 06/28, 07/14, 07/30, 08/15 |                |
|      |        |                | 120/39               | 07/21, 08/06, 08/22               |                |
|      |        |                | 120/40               | 07/21, 08/06, 08/22               |                |
|      |        | Landsat-8 OLI  | 118/39               | 06/13, 07/31, 08/16               | Auxiliary      |
|      |        |                | 119/39               | 06/04, 07/22, 08/07, 08/23        |                |
|      |        |                | 119/40               | 07/06, 07/22, 08/07, 08/23        |                |
|      |        |                | 120/39               | 07/13, 07/29, 08/14, 08/30        |                |
|      |        |                | 120/40               | 07/13, 07/29, 08/14, 08/30        |                |
|      | Winter | Landsat-7 ETM+ | 118/39               | 12/14, 12/30, 01/15, 01/31        | Auxiliary      |
|      |        |                | 119/39               | 12/05, 12/21, 02/07, 02/23        |                |
|      |        |                | 119/40               | 12/05, 12/21, 02/07, 02/23        |                |
|      |        |                | 120/39               | 12/12, 12/28, 01/13, 01/29, 02/14 |                |
|      |        |                | 120/40               | 12/12, 12/28, 01/13, 01/29, 02/14 |                |
|      |        | Landsat-8 OLI  | 118/39               | 12/06, 12/22, 02/24               | Auxiliary      |
|      |        |                | 119/39               | 12/13, 01/14, 01/30, 02/15        |                |
|      |        |                | 119/40               | 12/13, 12/29, 01/14, 01/30, 02/15 |                |
|      |        |                | 120/39               | 12/04, 12/20, 01/21, 02/06, 02/22 |                |
|      |        |                | 120/40               | 12/20, 01/21, 02/06, 02/22        |                |
| 2021 | Summer | Landsat-7 ETM+ | 118/39               | 06/08, 06/24, 07/10, 08/27        | Auxiliary      |
|      |        |                | 119/39               | 07/17, 08/02, 08/18               |                |
|      |        |                | 119/40               | 07/17, 08/02, 08/18               |                |
|      |        |                | 120/39               | 06/06, 06/22, 07/08, 08/09, 08/25 |                |
|      |        |                | 120/40               | 06/06, 06/22, 07/08, 08/09        |                |
|      |        | Landsat-8 OLI  | 118/39               | 07/18, 08/19                      | Classification |
|      |        |                | 119/39               | 06/07, 06/23, 07/09, 08/26        |                |
|      |        |                | 119/40               | 06/07, 06/23, 07/09, 08/26        |                |
|      |        |                | 120/39               | 06/14, 07/16, 08/01, 08/17        |                |
|      |        |                | 120/40               | 06/14, 07/16, 08/01               |                |
|      | Winter | Landsat-7 ETM+ | 118/39               | 12/01, 12/17, 01/02, 01/18        | Auxiliary      |
|      |        |                | 119/39               | 12/08, 12/24, 02/26               |                |
|      |        |                | 119/40               | 12/08, 12/24, 02/26               |                |
|      |        |                | 120/39               | 12/31, 01/16                      |                |
|      |        |                | 120/40               | 12/15, 12/31, 01/16               |                |
|      |        | Landsat-8 OLI  | 118/39               | 12/09, 01/10, 02/27               | Auxiliary      |
|      |        |                | 120/39               | 12/07, 12/23, 01/08, 02/25        |                |
|      |        |                | 120/40               | 12/07, 12/23, 01/08, 02/25        |                |
| 2022 | Summer | Landsat-7 ETM+ | 118/39               | 06/07, 06/24, 07/11, 07/28, 08/14 | Auxiliary      |
|      |        |                | 118/40               | 06/07, 06/24, 07/11, 07/28, 08/14 |                |
|      |        |                | 119/39               | 06/29, 08/02, 08/19               |                |
|      |        |                | 119/40               | 06/29, 07/16, 08/02, 08/19        |                |

|        |                 |        |                                          |                |
|--------|-----------------|--------|------------------------------------------|----------------|
| Winter | Landsat-8 OLI   | 120/39 | 06/17, 07/04, 07/21, 08/07, 08/24        | Auxiliary      |
|        |                 | 120/40 | 06/17, 07/04, 07/21, 08/07, 08/24        |                |
|        |                 | 118/39 | 07/05, 07/21, 08/06, 08/22               |                |
|        |                 | 119/39 | 06/10, 06/26, 07/12, 07/28, 08/13, 08/29 |                |
|        |                 | 119/40 | 06/26, 07/12, 07/28, 08/13, 08/29        |                |
|        |                 | 120/39 | 06/17, 07/03, 07/19, 08/04, 08/20        |                |
|        | Landsat-9 OLI-2 | 120/40 | 06/17, 07/03, 08/04, 08/20               | Auxiliary      |
|        |                 | 118/39 | 06/11, 06/27, 07/13, 07/29, 08/14, 08/30 |                |
|        |                 | 119/39 | 06/02, 06/18, 07/04, 07/20, 08/05, 08/21 |                |
|        |                 | 119/40 | 06/18, 07/04, 07/20, 08/05, 08/21        |                |
|        |                 | 120/39 | 06/09, 06/25, 07/11, 07/27, 08/12, 08/28 |                |
|        |                 | 120/40 | 06/09, 06/25, 07/11, 07/27, 08/12, 08/28 |                |
|        | Landsat-7 ETM+  | 118/39 | 12/11, 01/19, 02/22                      | Auxiliary      |
|        |                 | 118/40 | 01/19                                    |                |
|        |                 | 119/39 | 01/07                                    |                |
|        |                 | 119/40 | 01/07, 01/24                             |                |
|        |                 | 120/39 | 12/21, 01/12, 01/29, 02/15               |                |
|        |                 | 120/40 | 12/21, 01/12, 01/29, 02/15               |                |
|        | Landsat-8 OLI   | 118/39 | 12/28, 01/29, 02/14                      | Auxiliary      |
|        |                 | 119/39 | 12/19, 01/04, 01/20, 02/21               |                |
|        |                 | 119/40 | 12/19, 01/04, 01/20, 02/21               |                |
|        |                 | 120/39 | 12/26, 01/11                             |                |
|        |                 | 120/40 | 12/26, 01/11                             |                |
|        | Landsat-9 OLI-2 | 118/39 | 12/20, 01/21, 02/22                      | Classification |
|        |                 | 119/39 | 12/11, 12/27, 01/12, 01/28               |                |
|        |                 | 119/40 | 01/12, 01/28                             |                |
|        |                 | 120/39 | 12/02, 12/18, 01/03, 01/19, 02/04, 02/20 |                |
|        |                 | 120/40 | 12/18, 01/19, 02/20                      |                |
